# Supplementary material for: A biophysical model of kiwifruit (Actinidia deliciosa) berry development
Source: PubMed Central journal article supplement (PMC3871809; doi:10.1093/jxb/ert317), 2013-10-11
Supplement: supp_ert317_jexbot102210_file001.pdf [file supp_ert317_jexbot102210_file001.pdf]

1 **A biophysical model of kiwifruit (*Actinidia deliciosa*) berry**  
2 **development.**

3

4 A.J. Hall, P.E.H. Minchin, M.J. Clearwater, and M. Génard

5

6 **Supplementary Data.**

7

8 **The Fishman and Génard model including elasticity.**

9

10 The Fishman and Génard (1998) fruit model describes water and dry matter dynamics  
11 during peach fruit growth in terms of the physical forces and processes involved. The  
12 fruit is described as a single compartment, which takes up water and sugar through  
13 composite membranes separating it from the xylem and phloem, and loses water and  
14 dry matter through the processes of transpiration and respiration. The fruit's state at  
15 any time is described by two state variables, the mass of water ( $w$  (g)) and the dry  
16 weight ( $s$  (g)). The model is driven at an hourly time step by four input variables. Two  
17 of these are properties of the external environment: humidity ( $H$ ) and temperature ( $T$   
18 ( $^{\circ}\text{C}$ )) of the air. The other two are properties of the vasculature: the water potential of  
19 the vasculature ( $\psi_x$  (bar)) and the concentration of sugars in the phloem ( $C_p$  ( $\text{g g}^{-1}$ )). It  
20 is assumed that the water potential of the phloem is the same as that of the xylem, as  
21 the separating membrane is highly permeable to water, so their hydrostatic pressures  
22 differ only due to differences in solute potentials.

23

24 In brief, the model of Fishman and Génard can be described as follows. The rates of  
25 change of fruit water ( $w$ ) and dry matter ( $s$ ) at any time ( $t$ ) are given by

26 
$$\frac{dw}{dt} = U_x + U_p + r_w R_f - T_f \quad (\text{S1})$$

27 
$$\frac{ds}{dt} = U_s - R_f \quad (\text{S2})$$

28 where  $U_x$  and  $U_p$  are the amounts of water taken up per unit time from xylem and  
29 phloem respectively,  $U_s$  is the dry matter uptake rate, and  $T_f$  and  $R_f$  are total  
30 transpiration and respiration rates respectively. Note that following Brussières (1993)  
31 we have assumed that a fraction  $r_w=0.6$  of respired dry matter is converted to water.

32

1 We denote the osmotic and hydrostatic pressures in the phloem by  $\pi_p$  and  $P_p (= \pi_p + \psi_x)$   
 2 respectively, and in the xylem by  $\pi_x$  and  $P_x$ . Flows pass from the vasculature through  
 3 a composite membrane into the fruit tissues. The equations used to describe the mass  
 4 flow through the composite membrane are the same as those used by Fishman and  
 5 Génard (1998),

$$6 \quad U_x = A_x L_x [P_x^* - P_f - (\pi_x^* - \pi_f)] \quad (S3)$$

$$7 \quad U_p = A_p L_p [P_p^* - P_f - \sigma_p (\pi_p^* - \pi_f)] \quad (S4)$$

8 where  $P_f$  is fruit turgor,  $\pi_f$  is the osmotic pressure in the fruit, and a superscript \*  
 9 indicates values in the fruit vasculature rather than the plant vasculature in the original  
 10 Fishman and Génard (1998) paper. The value of the effective reflection coefficient  $\sigma_p$   
 11 of the membrane separating the phloem from the fruit allows the one equation to  
 12 describe both the xylem and phloem flows (i.e. equations S3 and S4 above). The  
 13 osmotic pressure in the xylem vasculature  $\pi_x^*$  is set to zero, and as the plasma  
 14 membrane is largely impermeable to sugars, a reflection coefficient of 1 is assumed  
 15 for the xylem. For simplicity, Fishman and Génard (1998) assumed that the  
 16 conductivity per unit area of the phloem membrane ( $L_p$ ) and that of the xylem ( $L_x$ )  
 17 were equal, as were the areas of the two membranes ( $A_p$  and  $A_x$  respectively). The  
 18 membrane areas were assumed to be proportional to fruit surface area:  $A_x = a_x A_f$ , and  
 19  $A_p = a_p A_f$ . Uptake of sugars (and hence dry matter) from the phloem into the fruit ( $U_s$ )  
 20 has three components:

$$21 \quad U_s = U_a + (1 - \sigma_p) C_s U_p + A_p p_s (C_p^* - C_f) \quad (S5)$$

22 The second term is uptake due to the mass flow above, and the third term is diffusive  
 23 flow given a total permeability of the membrane  $p_s$ .  $C_p^*$  and  $C_f$  are the concentrations  
 24 (proportions by weight) of sucrose in the phloem vasculature and fruit respectively,  
 25 and  $C_s$  is the average of these two. It is assumed that a proportion  $Z$  of the dry matter  $s$   
 26 is in soluble form, i.e.

$$27 \quad C_f = \frac{Zs}{w + Zs} \quad (S6)$$

28 Active uptake  $U_a$  is described by Michaelis-Menten kinetics,

$$29 \quad U_a = \frac{v_m C_v}{(K_M + C_v)} \quad (S7)$$

1 where  $v_m$  is the maximum uptake rate ( $\text{g h}^{-1}$ ) and  $K_M$  the Michaelis constant, the  
 2 concentration at which the uptake rate is half its maximum. Fishman and Génard  
 3 (1998) make  $v_m$  directly proportional to fruit dry weight  $s$ , and include the effect of  
 4 non-competitive inhibition late in the season.

5

6 Transpiration is driven by the difference between the humidity of air spaces within the  
 7 fruit ( $H_f = 0.996$  as in Fishman and Génard, 1998) and the humidity of the air;

$$8 \quad T_f = A_f \alpha \rho (H_f - H) \quad (\text{S8})$$

9 where  $A_f$  is the surface area of the fruit,  $\rho$  is the permeation coefficient of the fruit  
 10 surface to water vapour ( $\text{cm h}^{-1}$ ), and  $\alpha$  is dependent on temperature

$$11 \quad \alpha = \frac{M_w P^*}{RT_{abs}} \quad (\text{S9})$$

$$12 \quad P^* = 0.00805 \exp(0.0547T) \quad (\text{S10})$$

13 where  $R$  is the gas constant ( $83 \text{ cm}^3 \text{ bar mol}^{-1} \text{ K}^{-1}$ ),  $M_w$  is the molecular mass of water  
 14 ( $18 \text{ g mol}^{-1}$ ), and  $T_{abs}$  ( $=T+273.3$ ) is absolute temperature (K). Respiration  $R_f$  is given  
 15 implicitly by

$$16 \quad R_f = q_m(T)s + q_g (U_s - R_f) \quad (\text{S11})$$

17 where  $q_g$  and  $q_m(T)$  are the coefficients for growth and maintenance respiration  
 18 respectively, the latter being a function of temperature,

$$19 \quad q_m(T) = q_{m,293} Q_{10}^{\frac{T-20}{10}} \quad (\text{S12})$$

20 with  $q_{m,293}$  the value at  $20^\circ\text{C}$ , ( $293 \text{ K}$ ) and  $Q_{10}$  the factor by which this changes for  
 21 every  $10^\circ\text{C}$  change in temperature.

22

23 We calculate the osmotic pressure ( $\pi$ ) corresponding to any sucrose concentration  $C$   
 24 from

$$25 \quad \pi = \pi_o + RT \frac{C}{(1-C)M_s} \quad (\text{S13})$$

26 where  $M_s$  is the molecular mass of sucrose ( $342.3 \text{ g mol}^{-1}$ ) and  $\pi_o$  is the contribution  
 27 of other solutes to the osmotic pressure. Following Fishman and Génard (1998) we  
 28 use  $\pi_{p0} = 12.53 \text{ bar}$  in the phloem, and  $\pi_{f0} = 6.5 \text{ bar}$  in the fruit).

29

1 Turgor  $P_f$  is calculated by equating two expressions for the rate of change of the  
 2 volume of the fruit. Fruit volume ( $V$ ) can be written simply as

$$3 \quad V = \frac{w}{D_w} + \frac{s}{D_s} \quad (\text{S14})$$

4 where  $D_w$  (=1) and  $D_s$  (=1.6) are the densities of water and carbohydrate respectively,  
 5 so from the rate equations above

$$6 \quad \frac{dV}{dt} = \frac{U_x + U_p + r_w R_f - T_f}{D_w} + \frac{U_s - R_f}{D_s} \quad (\text{S15})$$

7 The second expression used in Fishman and Génard (1998) was Lockhart's equation,  
 8 but we follow Léchaudel *et al.* (2007) and include elasticity, so this becomes

$$9 \quad \frac{dV}{dt} = \frac{1}{\varepsilon} V \frac{dP_f}{dt} + \begin{cases} V\phi(P_f - Y) & P_f > Y \\ 0 & \text{otherwise} \end{cases} \quad (\text{S16})$$

10 where  $Y$  is the yield threshold,  $\phi$  is the cell wall extensibility, and  $\varepsilon$  is the elastic  
 11 modulus or elasticity (153 bar as given by Léchaudel *et al.*, 2007). Equating the right  
 12 hand side of equation S15 with the second term in equation S16 (Lockhart's  
 13 equation), Fishman and Génard (1998) obtained an algebraic expression for  $P_f$ , but  
 14 here we obtain the differential equation given by Léchaudel *et al.*, 2007),

$$15 \quad \frac{dP_f}{dt} = \frac{\varepsilon}{V} \left[ \frac{U_x + U_p + r_w R_f - T_f}{D_w} + \frac{U_s - R_f}{D_s} - \begin{cases} V\phi(P_f - Y) & P_f > Y \\ 0 & \text{otherwise} \end{cases} \right] \quad (\text{S17})$$

16 This means that if elastic changes occur, then it is not possible to project the state of  
 17 the fruit into the future without knowledge of its current turgor. With elasticity  
 18 included, turgor  $P_f$  becomes a third state variable of the fruit, whose rate of change  
 19 can be calculated from equation S17.

20

## References

- Brussières P.** 1993. Potential dry matter and water import rates in the tomato fruit in relationship to fruit size. *Annals of Botany* **72**, 63-72.
- Fishman S, Génard M.** 1998. A biophysical model of fruit growth: simulation of seasonal and diurnal dynamics of mass. *Plant, Cell and Environment* **21**, 739-752.
- Léchaudel M, Vercambre G, Lescourret F, Normand F, Génard M.** 2007. An analysis of elastic and plastic fruit growth of mango in response to various assimilate supplies. *Tree Physiology* **27**, 219-230.
